# Supplementary material for: Destabilization of lithium hydride and the thermodynamic assessment of the Li–Al–H system for solar thermal energy storage
Source: Royal Society of Chemistry journal article supplement (doi:10.1039/c6ra16983j), 2016-01-01
Supplement: c6ra16983j1.pdf [file c6ra16983j1.pdf]

## Supporting Information

Table S1. Possible reactions taking place at the various temperatures and the respective H<sub>2</sub> capacities. These reactions are determined according to the Li-Al phase diagram.

| Temperature | Reaction                                                                                                              | wt.% H <sub>2</sub> |
|-------------|-----------------------------------------------------------------------------------------------------------------------|---------------------|
| 506         | $2 \text{LiH} + 3.23\text{Li}_{0.126}\text{Al}_{0.874} \rightarrow 5.23\text{Li}_{0.46}\text{Al}_{0.54} + \text{H}_2$ | 2.12                |
| 540         | $2 \text{LiH} + 3.28\text{Li}_{0.131}\text{Al}_{0.869} \rightarrow 5.28\text{Li}_{0.46}\text{Al}_{0.54} + \text{H}_2$ | 2.10                |
| 560         | $2 \text{LiH} + 3.40\text{Li}_{0.142}\text{Al}_{0.858} \rightarrow 5.40\text{Li}_{0.46}\text{Al}_{0.54} + \text{H}_2$ | 2.06                |
| 573         | $2 \text{LiH} + 3.42\text{Li}_{0.144}\text{Al}_{0.856} \rightarrow 5.42\text{Li}_{0.46}\text{Al}_{0.54} + \text{H}_2$ | 2.05                |
| 585         | $2 \text{LiH} + 3.48\text{Li}_{0.150}\text{Al}_{0.850} \rightarrow 5.48\text{Li}_{0.46}\text{Al}_{0.54} + \text{H}_2$ | 2.03                |

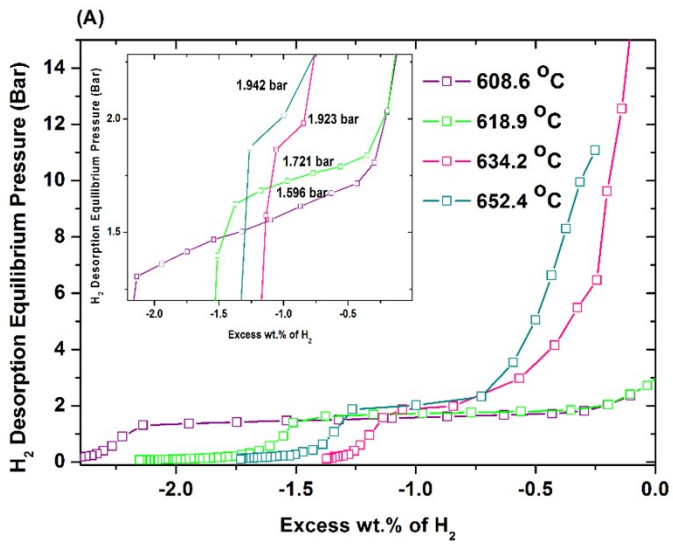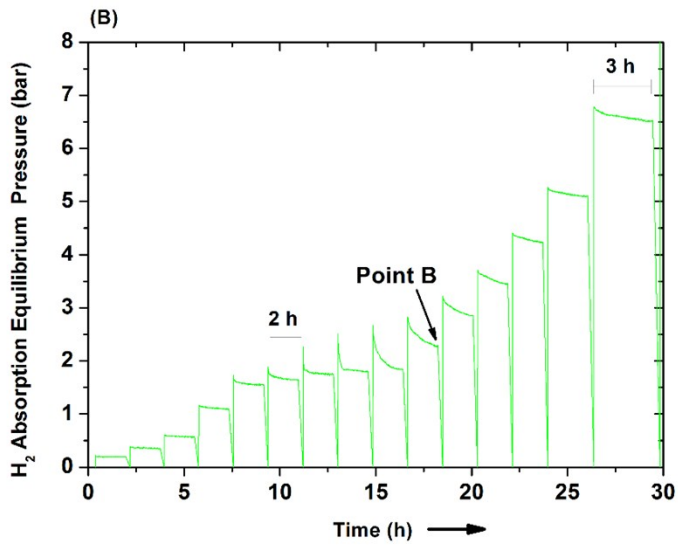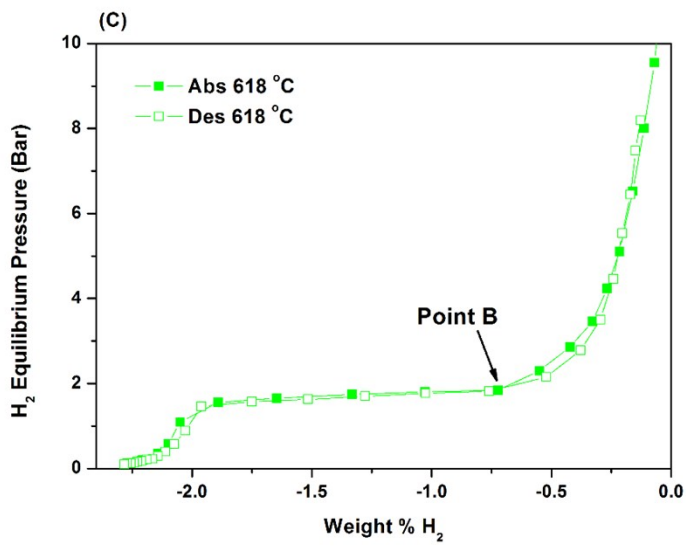

Figure S1. (A) Hydrogen desorption pressure – composition isotherms for reaction (2) performed at various temperatures above 600 °C. Hydrogen desorption equilibrium data below ~2.5 wt.% desorption has been displayed, and the inset of the figure provides the apparent equilibrium pressures. (B) Kinetic H<sub>2</sub> absorption data performed at 617.8 °C. (C) Desorption PCI followed by an absorption PCI performed at 617.8 °C. The slight hysteresis between the two curves either side of the plateau is the result of slow kinetics.

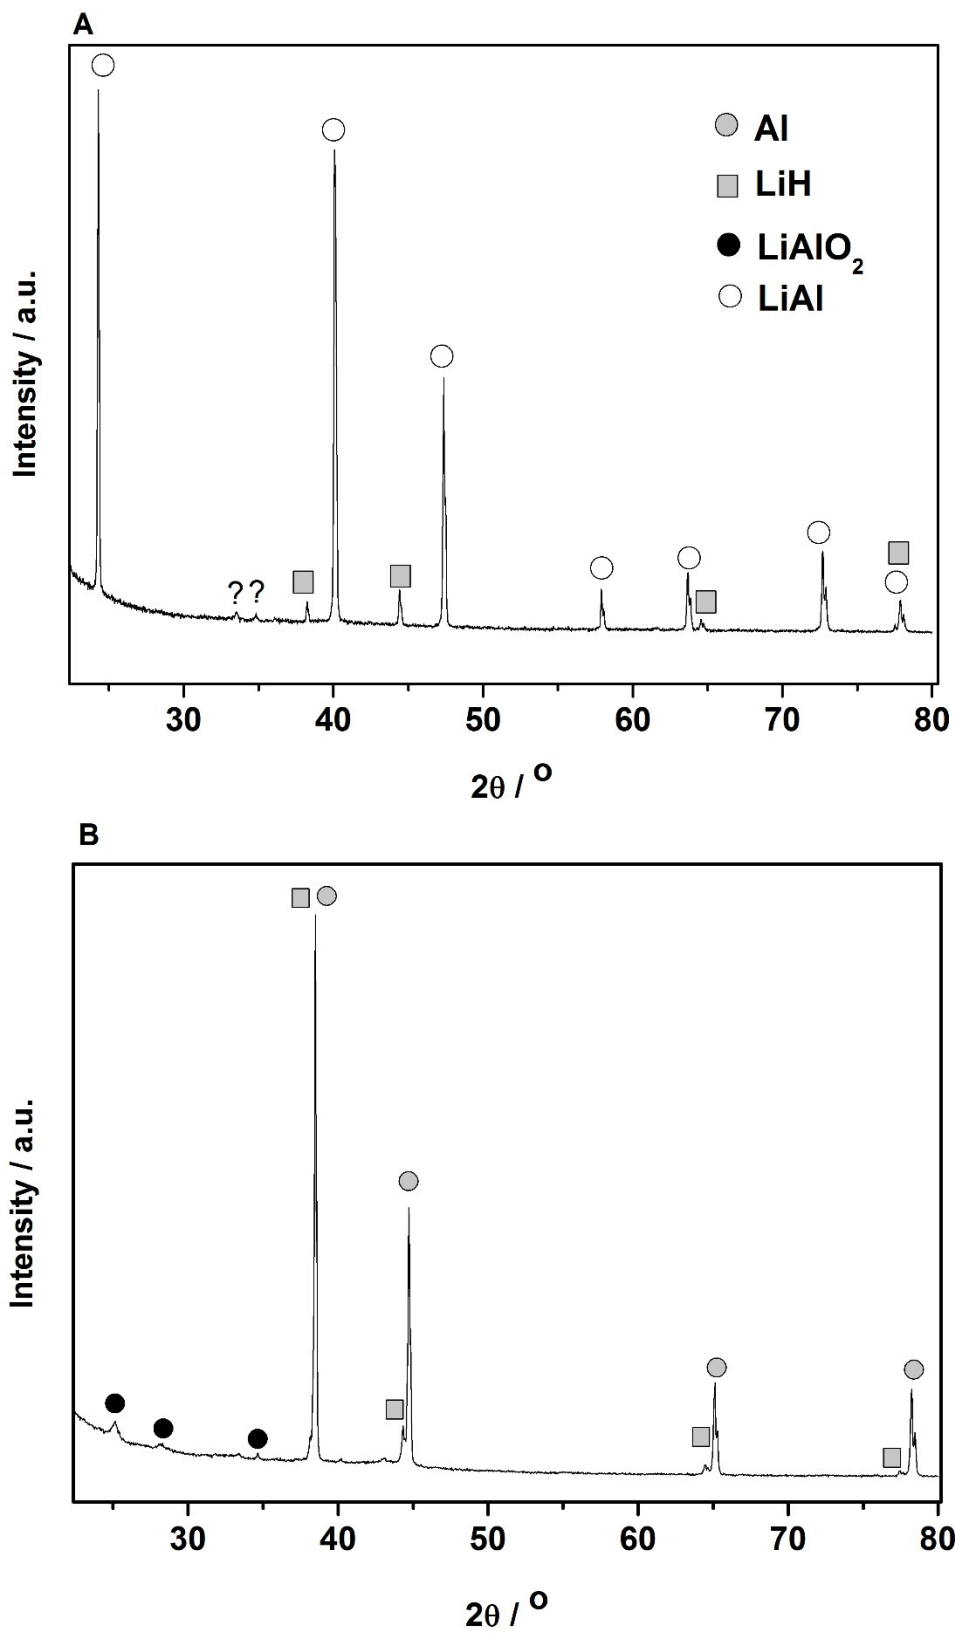

Figure S2 Powder X-ray diffraction pattern of the Li-Al-H sample after dehydrogenation at 618 °C (A) and after rehydrogenation (B).
